# Supplementary material for: Anti-Inflammatory Effect of Artemisia argyi on Ethanol-Induced Gastric Ulcer: Analytical, In Vitro and In Vivo Studies for the Identification of Action Mechanism and Active Compounds
Source: Plants (Basel). 2021 Feb 9;10(2):332. doi: 10.3390/plants10020332 (PMC7914715; doi:10.3390/plants10020332)
Supplement: Supplementary file 1 [file plants-10-00332-s001.pdf]

## Supplementary table 1.

### Material & Method

Genomic DNA extraction from the leaves was performed using the G-spin™ Genomic DNA extraction Kit (Intron, Korea) then purified PCR products using PCRquick-spin™ PCR product Purification Kit (Intron, Korea). To identified plant species, chloroplast DNA marker (*matK*, *rbcL*, *atpF-atpH*, *psbK-psbI*, *trnH-psbA*) and nuclear DNA marker ITS (intergenic transcribed spacer) were amplified. The final nucleotide sequence was analyzed using Geneious 11.1.2.

### Result

The result of comparing the base sequence with Genbank using BLAST is as follows Table 1. As a result of BLAST analysis of the nrITS nucleotide sequence of the sample, it was found to be 99% consistent with *Artemisia argyi* L., thus it was confirmed.

| Table 1. GenBank BLAST Report                                                                         |                                                                                    |                                                                                                |
|-------------------------------------------------------------------------------------------------------|------------------------------------------------------------------------------------|------------------------------------------------------------------------------------------------|
| <b>rbcL</b>                                                                                           | <b>matK</b>                                                                        | <b>ITS</b>                                                                                     |
| Artemisia argyi<br>1299 <sup>i</sup> 100% <sup>ii</sup> KM386991.1 <sup>iii</sup>                     | Artemisia argyi<br>1572 <sup>i</sup> 99% <sup>ii</sup> KM386991.1 <sup>iii</sup>   | Artemisia argyi<br>1269 <sup>i</sup> 99% <sup>ii</sup> KX421699.1 <sup>iii</sup>               |
| Artemisia montana<br>1299 <sup>i</sup> 100% <sup>ii</sup> KF887960.1 <sup>iii</sup>                   | Artemisia montana<br>1572 <sup>i</sup> 99% <sup>ii</sup> KF887960.1 <sup>iii</sup> | Artemisia argyi<br>1269 <sup>i</sup> 99% <sup>ii</sup> KX421696.1 <sup>iii</sup>               |
| Artemisia argyi<br>1299 <sup>i</sup> 100% <sup>ii</sup> GQ436428.1 <sup>iii</sup>                     | Artemisia argyi<br>1567 <sup>i</sup> 100% <sup>ii</sup> KR231888.1 <sup>iii</sup>  | Artemisia argyi<br>1269 <sup>i</sup> 99% <sup>ii</sup> GU724269.1 <sup>iii</sup>               |
| <b>atpF-atpH</b>                                                                                      | <b>psbK-psbI</b>                                                                   | <b>trnH-psbA</b>                                                                               |
| Artemisia annua<br>1003 <sup>i</sup> 100% <sup>ii</sup> MF623173.1 <sup>iii</sup>                     | Artemisia argyi<br>758 <sup>i</sup> 99% <sup>ii</sup> KM386991.1 <sup>iii</sup>    | Artemisia argyi var. gracilis<br>859 <sup>i</sup> 100% <sup>ii</sup> KU555808.1 <sup>iii</sup> |
| Artemisia gmelinii<br>1003 <sup>i</sup> 100% <sup>ii</sup> KY073390.1 <sup>iii</sup>                  | Artemisia montana<br>758 <sup>i</sup> 99% <sup>ii</sup> KF887960.1 <sup>iii</sup>  | Artemisia argyi var. gracilis<br>859 <sup>i</sup> 100% <sup>ii</sup> KU555808.1 <sup>iii</sup> |
| Artemisia argyi<br>1003 <sup>i</sup> 100% <sup>ii</sup> KY085890.1 <sup>iii</sup>                     | Artemisia montana<br>752 <sup>i</sup> 99% <sup>ii</sup> NC_037388.1 <sup>iii</sup> | Artemisia argyi<br>859 <sup>i</sup> 100% <sup>ii</sup> KU555799.1 <sup>iii</sup>               |
| <sup>i</sup> )Maximum match Scores <sup>ii</sup> )Maximum similarities <sup>iii</sup> )Accession Num. |                                                                                    |                                                                                                |

### Reference

Liu, Geyu, et al. "Evaluation of DNA barcode candidates for the discrimination of Artemisia L." Mitochondrial DNA Part A 28.6 (2017): 956-964.

Wang, Xiao-yue, et al. "ITS2, a Better DNA Barcode than ITS in Identification of Species in Artemisia L." Chinese Herbal Medicines 8.4 (2016): 352-358
